# Supplementary material for: Characteristics of Dissolved Organic Matter in Sediments of Typical Lakes in Southeastern Hubei Province, China
Source: MDPI journal article supplement (doi:10.3390/ijerph19127402), 2022-06-16
Supplement: s1 [file s1]

# Characteristics of dissolved organic matter in sediments of typical lakes in southeastern Hubei Province, China

— *Supplementary Materials* —

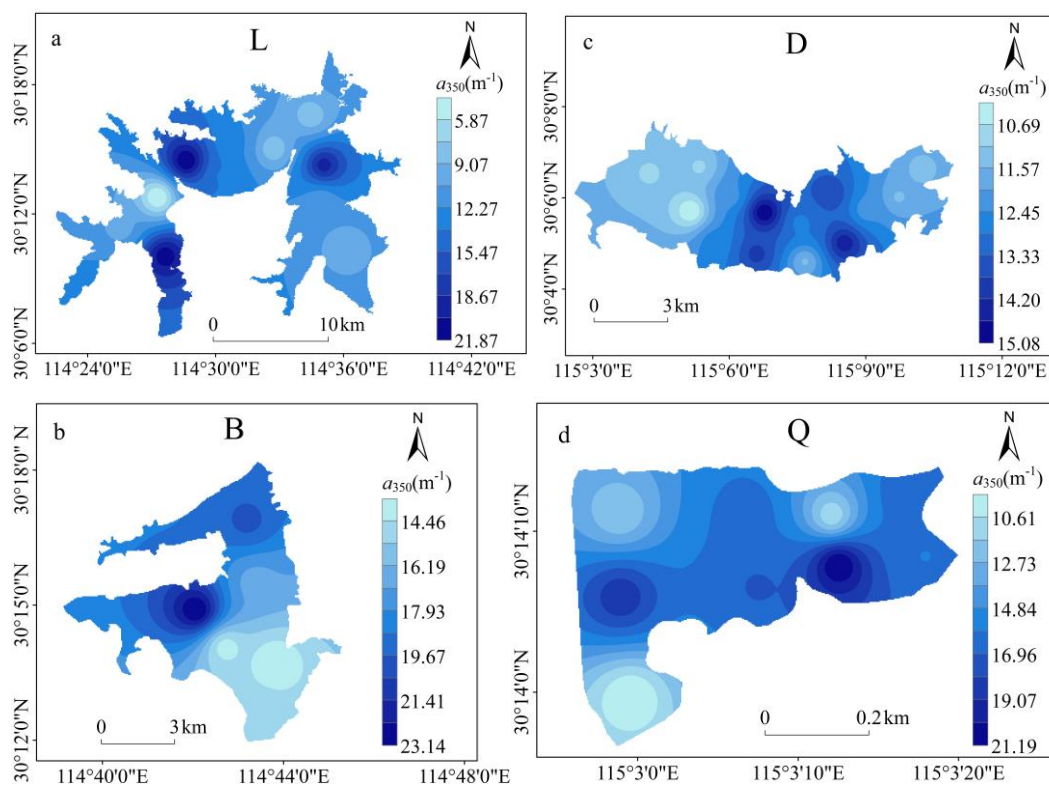

**Supplementary Figure S1.** Spatial distributions of  $a_{350}$

in the surface sediments of four typical lakes.

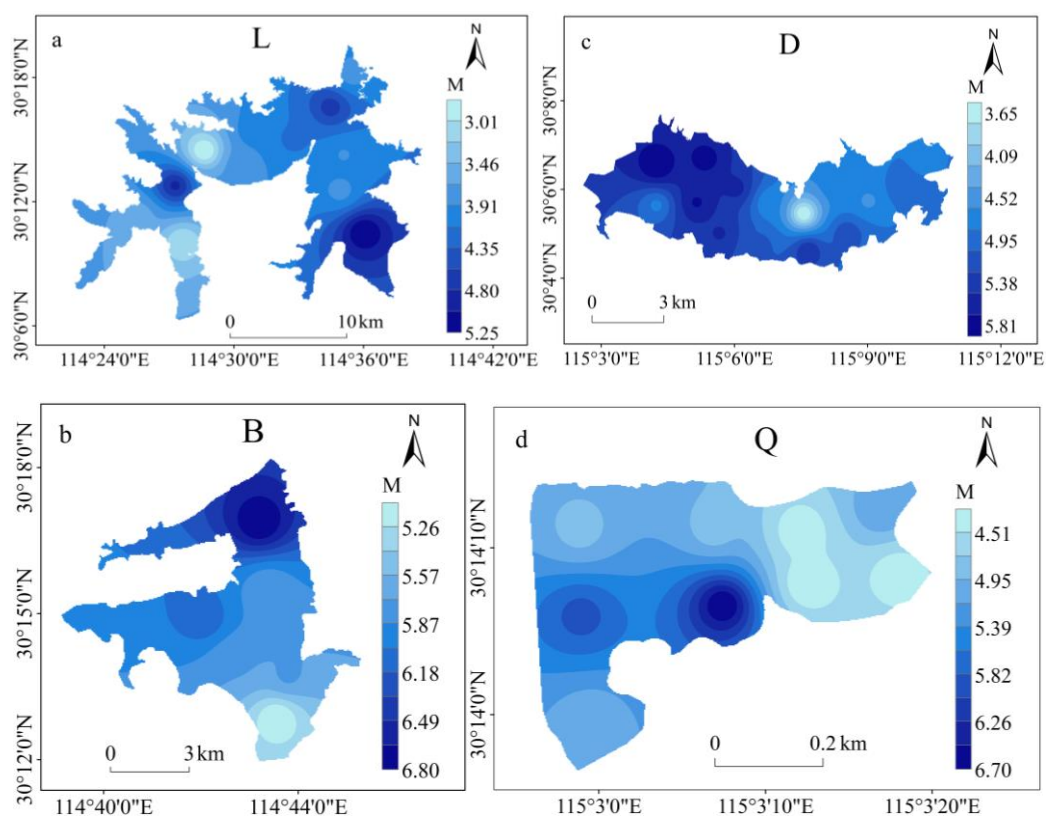

**Supplementary Figure S2.** Spatial distributions of M values in surface sediments of four typical lakes.

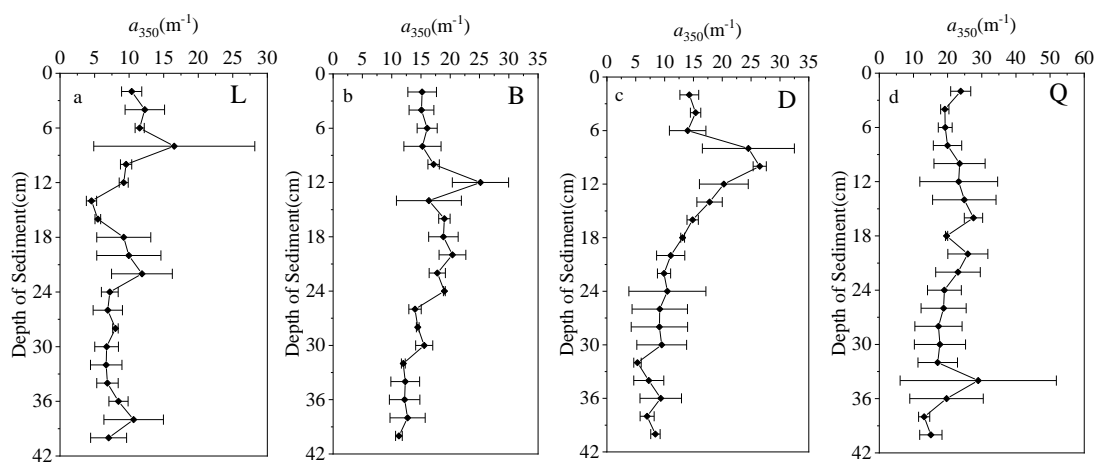

**Supplementary Figure S3.** Vertical distributions of  $a_{350}$  in sediment cores from four typical lakes.

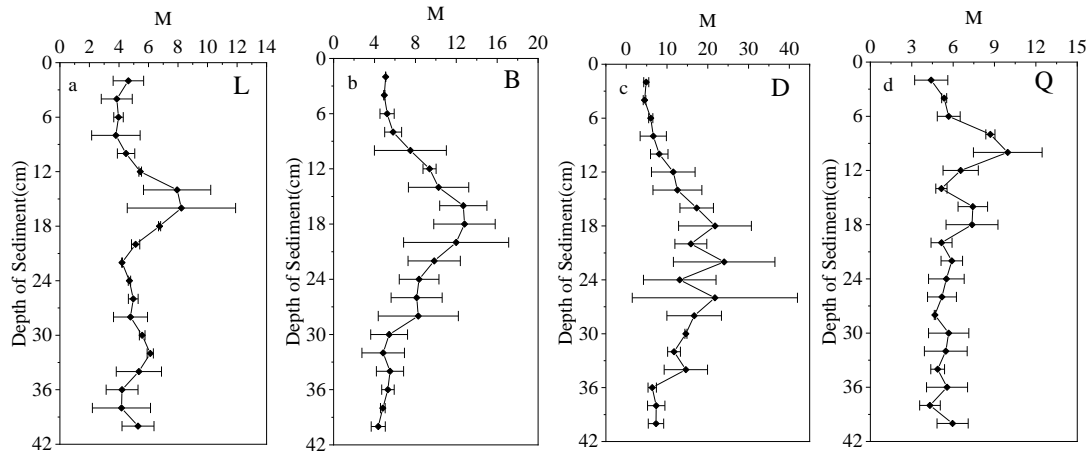

**Supplementary Figure S4.** Vertical distributions of M in sediment cores of four typical lakes.

**Supplementary Table S1.** Vertical distribution of FDOM in sediment cores.

| Lake | Depth (cm) | F <sub>1max</sub> (RU) |             | F <sub>2max</sub> (RU) |             | F <sub>3max</sub> (RU) |             |
|------|------------|------------------------|-------------|------------------------|-------------|------------------------|-------------|
|      |            | Min ~ Max              | Mean ± S.D. | Min ~ Max              | Mean ± S.D. | Min ~ Max              | Mean ± S.D. |
| L    | 0 ~ 10     | 0.24 ~ 0.32            | 0.27 ± 0.03 | 0.13 ~ 0.20            | 0.16 ± 0.02 | 0.11 ~ 0.34            | 0.16 ± 0.07 |
|      | 11 ~ 20    | 0.16 ~ 0.27            | 0.20 ± 0.04 | 0.10 ~ 0.17            | 0.12 ± 0.02 | 0.08 ~ 0.41            | 0.18 ± 0.12 |
|      | 21 ~ 30    | 0.18 ~ 0.39            | 0.25 ± 0.08 | 0.10 ~ 0.21            | 0.14 ± 0.04 | 0.07 ~ 0.58            | 0.21 ± 0.15 |
|      | 31 ~ 40    | 0.17 ~ 0.54            | 0.31 ± 0.14 | 0.09 ~ 0.26            | 0.16 ± 0.06 | 0.06 ~ 0.34            | 0.21 ± 0.11 |
| B    | 0 ~ 10     | 0.39 ~ 0.66            | 0.56 ± 0.09 | 0.26 ~ 0.45            | 0.38 ± 0.06 | 0.19 ~ 0.34            | 0.27 ± 0.05 |
|      | 11 ~ 20    | 0.30 ~ 0.74            | 0.51 ± 0.11 | 0.23 ~ 0.53            | 0.39 ± 0.09 | 0.13 ~ 0.33            | 0.20 ± 0.06 |
|      | 21 ~ 30    | 0.27 ~ 0.66            | 0.45 ± 0.11 | 0.20 ~ 0.40            | 0.31 ± 0.06 | 0.10 ~ 0.20            | 0.15 ± 0.03 |
|      | 31 ~ 40    | 0.20 ~ 0.49            | 0.37 ± 0.09 | 0.13 ~ 0.32            | 0.24 ± 0.06 | 0.07 ~ 0.17            | 0.12 ± 0.03 |
| D    | 0 ~ 10     | 0.30 ~ 0.62            | 0.46 ± 0.09 | 0.21 ~ 0.75            | 0.42 ± 0.18 | 0.11 ~ 0.23            | 0.17 ± 0.04 |
|      | 11 ~ 20    | 0.28 ~ 0.54            | 0.36 ± 0.09 | 0.20 ~ 0.58            | 0.34 ± 0.11 | 0.09 ~ 0.18            | 0.13 ± 0.03 |
|      | 21 ~ 30    | 0.19 ~ 0.33            | 0.27 ± 0.05 | 0.11 ~ 0.26            | 0.19 ± 0.07 | 0.06 ~ 0.14            | 0.09 ± 0.03 |
|      | 31 ~ 40    | 0.15 ~ 0.34            | 0.22 ± 0.07 | 0.08 ~ 0.19            | 0.13 ± 0.04 | 0.05 ~ 0.12            | 0.08 ± 0.03 |
| Q    | 0 ~ 10     | 0.53 ~ 0.88            | 0.73 ± 0.13 | 0.32 ~ 0.61            | 0.46 ± 0.09 | 0.33 ~ 0.61            | 0.52 ± 0.09 |
|      | 11 ~ 20    | 0.40 ~ 0.89            | 0.65 ± 0.14 | 0.24 ~ 0.68            | 0.49 ± 0.13 | 0.19 ~ 0.50            | 0.31 ± 0.11 |
|      | 21 ~ 30    | 0.43 ~ 0.79            | 0.64 ± 0.12 | 0.28 ~ 0.57            | 0.44 ± 0.10 | 0.14 ~ 0.29            | 0.21 ± 0.05 |
|      | 31 ~ 40    | 0.44 ~ 1.13            | 0.66 ± 0.22 | 0.27 ~ 1.04            | 0.48 ± 0.24 | 0.12 ~ 0.49            | 0.22 ± 0.11 |

Note: Min, max, and mean denote the minimum, maximum, and mean values, respectively; S.D. denotes standard deviation.

**Supplementary Table S2.** Correlations among  $a_{350}$ , TN, TP, OM, and FDOM components.

|   |           | $a_{350}$ | TN      | TP      | OM      | C1      | C2      | C3 |
|---|-----------|-----------|---------|---------|---------|---------|---------|----|
| L | $a_{350}$ | 1         |         |         |         |         |         |    |
|   | TN        | 0.141     | 1       |         |         |         |         |    |
|   | TP        | 0.223     | 0.388** | 1       |         |         |         |    |
|   | OM        | 0.309*    | 0.409** | 0.319*  | 1       |         |         |    |
|   | C1        | 0.343*    | -0.138  | 0.068   | 0.229   | 1       |         |    |
|   | C2        | 0.518**   | -0.106  | 0.063   | 0.247   | 0.933** | 1       |    |
|   | C3        | 0.344*    | -0.252  | -0.170  | 0.051   | 0.121   | 0.214   | 1  |
|   |           | $a_{350}$ | TN      | TP      | OM      | C1      | C2      | C3 |
| B | $a_{350}$ | 1         |         |         |         |         |         |    |
|   | TN        | 0.430**   | 1       |         |         |         |         |    |
|   | TP        | 0.635**   | 0.28    | 1       |         |         |         |    |
|   | OM        | 0.507**   | 0.796** | 0.431** | 1       |         |         |    |
|   | C1        | 0.598**   | 0.371*  | 0.323*  | 0.611** | 1       |         |    |
|   | C2        | 0.728**   | 0.363*  | 0.542** | 0.591** | 0.931** | 1       |    |
|   | C3        | 0.591**   | 0.467** | 0.542** | 0.707** | 0.889** | 0.871** | 1  |
|   |           | $a_{350}$ | TN      | TP      | OM      | C1      | C2      | C3 |
| D | $a_{350}$ | 1         |         |         |         |         |         |    |
|   | TN        | 0.609**   | 1       |         |         |         |         |    |
|   | TP        | 0.294*    | 0.436** | 1       |         |         |         |    |
|   | OM        | 0.602**   | 0.846** | 0.333*  | 1       |         |         |    |
|   | C1        | 0.653**   | 0.775** | 0.556** | 0.808** | 1       |         |    |
|   | C2        | 0.918**   | 0.766** | 0.387** | 0.787** | 0.844** | 1       |    |
|   | C3        | 0.827**   | 0.730** | 0.534** | 0.707** | 0.874** | 0.885** | 1  |
|   |           | $a_{350}$ | TN      | TP      | OM      | C1      | C2      | C3 |
| Q | $a_{350}$ | 1         |         |         |         |         |         |    |
|   | TN        | 0.274     | 1       |         |         |         |         |    |
|   | TP        | 0.428**   | 0.087   | 1       |         |         |         |    |
|   | OM        | 0.476**   | 0.132   | 0.528** | 1       |         |         |    |
|   | C1        | 0.815**   | 0.388** | 0.367** | 0.475** | 1       |         |    |
|   | C2        | 0.911**   | 0.296*  | 0.375** | 0.449** | 0.929** | 1       |    |
|   | C3        | 0.485**   | 0.364*  | 0.368** | 0.368** | 0.612** | 0.421** | 1  |

Note: \*\* denotes significant correlations at the 0.01 level (two-sided), \* denotes significant correlations at the 0.05 level (two-sided).

**Supplementary Table S3.** Vertical distributions of HIX, BIX and FI  
in sediment cores from four typical lakes.

| Lake | Depth<br>(cm) | HIX         |                 | BIX         |                 | FI          |                 |
|------|---------------|-------------|-----------------|-------------|-----------------|-------------|-----------------|
|      |               | Min ~ Max   | Mean $\pm$ S.D. | Min ~ Max   | Mean $\pm$ S.D. | Min ~ Max   | Mean $\pm$ S.D. |
| L    | 0 ~ 10        | 0.48 ~ 1.95 | 1.52 $\pm$ 0.43 | 0.84 ~ 3.09 | 1.21 $\pm$ 0.69 | 1.83 ~ 2.03 | 1.89 $\pm$ 0.07 |
|      | 11 ~ 20       | 0.35 ~ 4.70 | 1.84 $\pm$ 1.40 | 0.97 ~ 4.36 | 1.88 $\pm$ 1.22 | 1.71 ~ 1.99 | 1.83 $\pm$ 0.09 |
|      | 21 ~ 30       | 1.20 ~ 4.47 | 2.22 $\pm$ 1.01 | 1.06 ~ 1.83 | 1.39 $\pm$ 0.23 | 1.65 ~ 1.81 | 1.72 $\pm$ 0.05 |
|      | 31 ~ 40       | 1.24 ~ 5.97 | 3.25 $\pm$ 1.86 | 1.06 ~ 1.96 | 1.33 $\pm$ 0.32 | 1.63 ~ 1.78 | 1.73 $\pm$ 0.05 |
| B    | 0 ~ 10        | 2.08 ~ 3.35 | 2.51 $\pm$ 0.40 | 0.74 ~ 0.91 | 0.80 $\pm$ 0.05 | 1.73 ~ 1.83 | 1.79 $\pm$ 0.03 |
|      | 11 ~ 20       | 2.20 ~ 4.18 | 3.07 $\pm$ 0.64 | 0.81 ~ 1.05 | 0.91 $\pm$ 0.07 | 1.66 ~ 1.84 | 1.73 $\pm$ 0.06 |
|      | 21 ~ 30       | 2.54 ~ 4.10 | 3.39 $\pm$ 0.49 | 0.78 ~ 1.02 | 0.90 $\pm$ 0.07 | 1.61 ~ 1.72 | 1.66 $\pm$ 0.03 |
|      | 31 ~ 40       | 2.11 ~ 4.00 | 3.44 $\pm$ 0.61 | 0.86 ~ 0.99 | 0.92 $\pm$ 0.04 | 1.58 ~ 1.66 | 1.63 $\pm$ 0.03 |
| D    | 0 ~ 10        | 2.61 ~ 4.00 | 3.15 $\pm$ 0.43 | 0.78 ~ 1.05 | 0.91 $\pm$ 0.11 | 1.71 ~ 2.09 | 1.85 $\pm$ 0.13 |
|      | 11 ~ 20       | 3.14 ~ 3.91 | 3.59 $\pm$ 0.25 | 0.93 ~ 1.03 | 0.98 $\pm$ 0.03 | 1.78 ~ 2.01 | 1.86 $\pm$ 0.06 |
|      | 21 ~ 30       | 2.93 ~ 4.41 | 3.44 $\pm$ 0.53 | 0.92 ~ 1.08 | 1.03 $\pm$ 0.05 | 1.71 ~ 1.90 | 1.77 $\pm$ 0.05 |
|      | 31 ~ 40       | 2.50 ~ 4.02 | 3.15 $\pm$ 0.47 | 0.81 ~ 1.12 | 1.01 $\pm$ 0.09 | 1.69 ~ 1.81 | 1.75 $\pm$ 0.05 |
| Q    | 0 ~ 10        | 0.99 ~ 1.82 | 1.34 $\pm$ 0.25 | 0.77 ~ 1.14 | 0.88 $\pm$ 0.11 | 1.77 ~ 1.97 | 1.86 $\pm$ 0.05 |
|      | 11 ~ 20       | 1.27 ~ 3.94 | 2.73 $\pm$ 0.96 | 0.88 ~ 1.15 | 0.98 $\pm$ 0.07 | 1.72 ~ 2.02 | 1.85 $\pm$ 0.11 |
|      | 21 ~ 30       | 3.21 ~ 6.02 | 4.27 $\pm$ 0.91 | 0.83 ~ 0.95 | 0.89 $\pm$ 0.04 | 1.69 ~ 1.89 | 1.76 $\pm$ 0.06 |
|      | 31 ~ 40       | 2.74 ~ 5.03 | 4.22 $\pm$ 0.65 | 0.76 ~ 1.00 | 0.88 $\pm$ 0.08 | 1.66 ~ 1.88 | 1.74 $\pm$ 0.07 |

Note: Min, max, and mean denote the minimum, maximum, and mean values, respectively; S.D. denotes standard deviation.
